# Supplementary material for: Curcumin–Coumarin Hybrid Analogues as Multitarget Agents in Neurodegenerative Disorders
Source: MDPI journal article supplement (doi:10.3390/molecules26154550), 2021-07-28

# Supporting information

## Curcumin-Coumarin Hybrid Analogues as Multitarget Agents in Neurodegenerative Disorders

Elías Quezada<sup>1</sup>, Fernanda Rodríguez-Enríquez<sup>2</sup>, Reyes Laguna<sup>2</sup>, Elena Cutrín<sup>3</sup>, Francisco Otero<sup>3</sup>, Eugenio Uriarte<sup>1,4</sup> and Dolores Viña<sup>2,\*</sup>

<sup>1</sup> Department of Organic Chemistry, Faculty of Pharmacy, Universidade de Santiago de Compostela, 15782 Santiago de Compostela, Spain; [elias.quezada@usc.es](mailto:elias.quezada@usc.es); [eugenio.uriarte@usc.es](mailto:eugenio.uriarte@usc.es)

<sup>2</sup> Department of Pharmacology, Pharmacy and Pharmaceutical Technology and Center for Research in Molecular Medicine and Chronic Disease (CIMUS), Universidade de Santiago de Compostela, 15782 Santiago de Compostela, Spain; [nana.enriquez@gmail.com](mailto:nana.enriquez@gmail.com); [mdelosreyes.laguna@usc.es](mailto:mdelosreyes.laguna@usc.es)

<sup>3</sup> Department of Pharmacy and Pharmaceutical Technology, Faculty of Pharmacy, Universidade de Santiago de Compostela, 15782 Santiago de Compostela, Spain; [elena.cutrin@rai.usc.es](mailto:elena.cutrin@rai.usc.es); [francisco.otero@usc.es](mailto:francisco.otero@usc.es)

<sup>4</sup> Instituto de Ciencias Químicas Aplicadas, Universidad Autónoma de Chile, 7500912 Santiago, Chile

\*Correspondence: [mdolores.vina@usc.es](mailto:mdolores.vina@usc.es); Tel.: +34 881 815 424

# Compound 5: $^1\text{H}$ and $^{13}\text{C}$ NMR

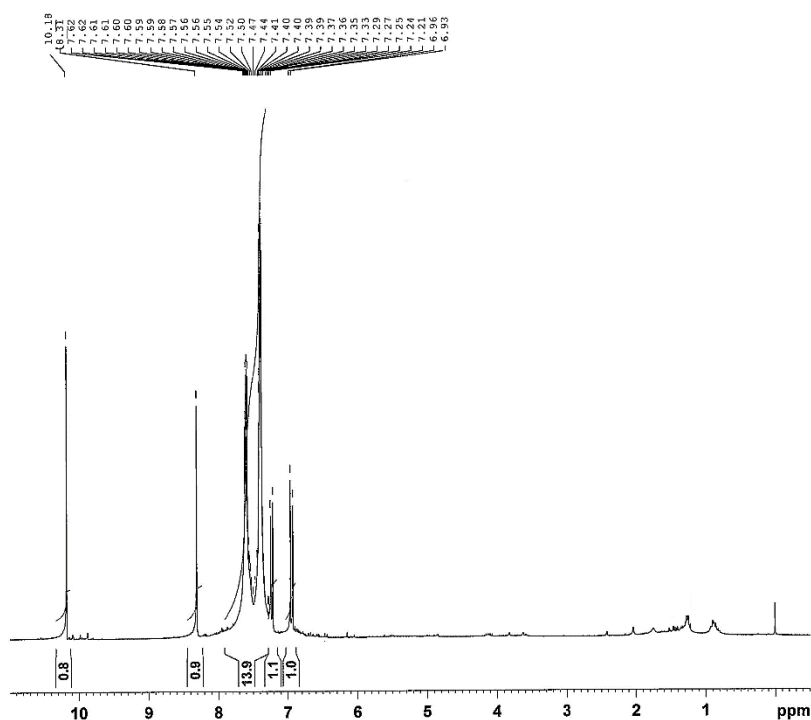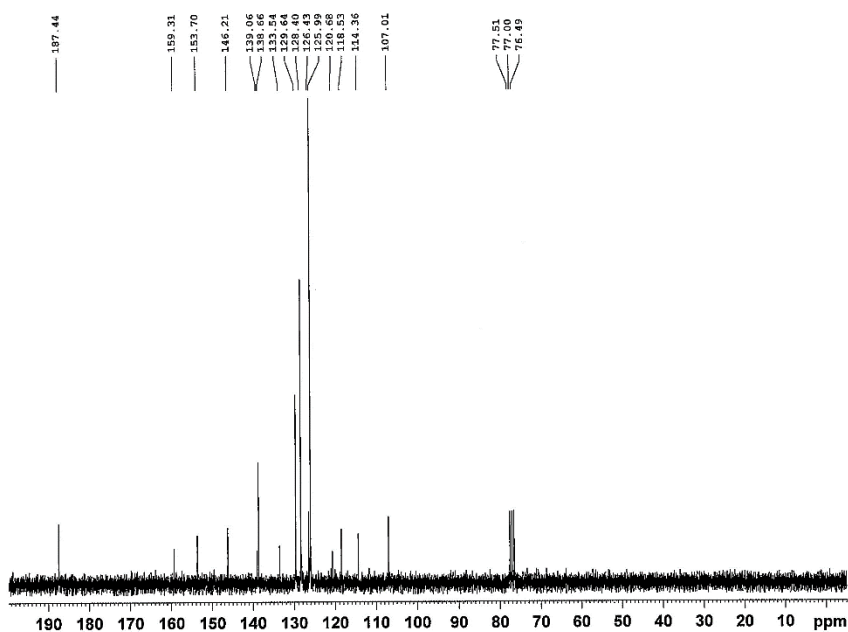

# Compound 9: $^1\text{H}$ and $^{13}\text{C}$ NMR

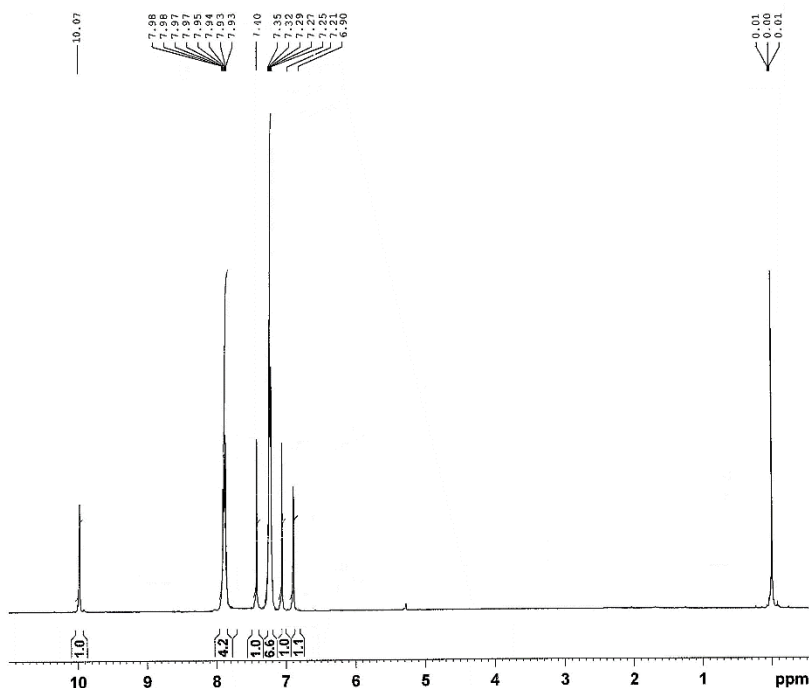

Current Data Parameters  
NAME 67Dioxo3CHOCum  
EXPNO 1  
PROCNO 1

F2 - Acquisition Parameters  
Date\_ 20160426  
Time 13.42  
INSTRUM spect  
PROBHD 5 mm Dual 13C/  
PULPROG zg30  
TD 32768  
SOLVENT CDCl3  
NS 6  
DS 0  
SWH 4496.403 Hz  
FIDRES 0.137219 Hz  
AQ 3.6438515 sec  
RG 181  
DW 111.200 usec  
DE 10.50 usec  
TE 300.0 K  
D1 1.50000000 sec  
TD0 1

===== CHANNEL f1 =====  
NUC1  $^1\text{H}$   
P1 9.75 usec  
PL1 -6.00 dB  
SFO1 250.1315581 MHz

F2 - Processing parameters  
SI 16384  
SF 250.1300039 MHz  
WDW no  
SSB 0  
LB 0.00 Hz  
GB 0  
PC 1.00

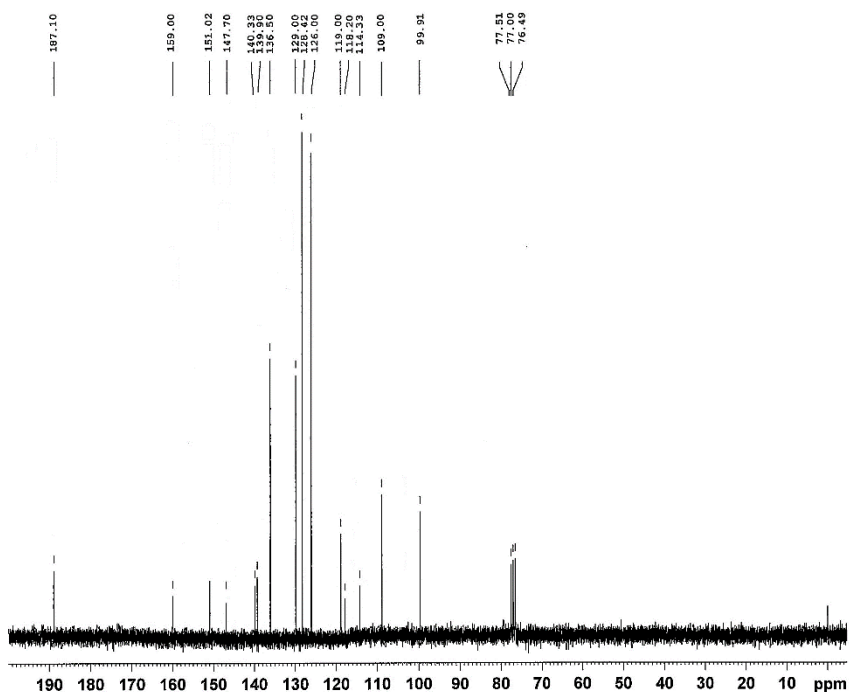

Current Data Parameters  
NAME 67Dioxo3CHOCum  
EXPNO 1  
PROCNO 1

F2 - Acquisition Parameters  
Date\_ 20160426  
Time 13.45  
INSTRUM spect  
PROBHD 5 mm Dual 13C/  
PULPROG zgpg30  
TD 65536  
SOLVENT CDCl3  
NS 231  
DS 0  
SWH 18832.393 Hz  
FIDRES 0.287360 Hz  
AQ 1.7400308 sec  
RG 8192  
DW 26.550 usec  
DE 10.50 usec  
TE 300.0 K  
D1 0.38000000 sec  
d11 0.03000000 sec  
DELTA 0.28000000 sec  
TD0 1

===== CHANNEL f1 =====  
NUC1  $^{13}\text{C}$   
P1 10.00 usec  
PL1 -2.00 dB  
SFO1 62.9015374 MHz

===== CHANNEL f2 =====  
CPDPRG2 waltz16  
NUC2  $^1\text{H}$   
PCPD2 100.00 usec  
PL2 120.00 dB  
PL12 15.00 dB  
PL13 15.00 dB  
SFO2 250.1310005 MHz

F2 - Processing parameters  
SI 32768  
SF 62.8952443 MHz  
WDW no  
SSB 0  
LB 0.00 Hz  
GB 0  
PC 1.00

# Compound 11: $^1\text{H}$ and $^{13}\text{C}$ NMR

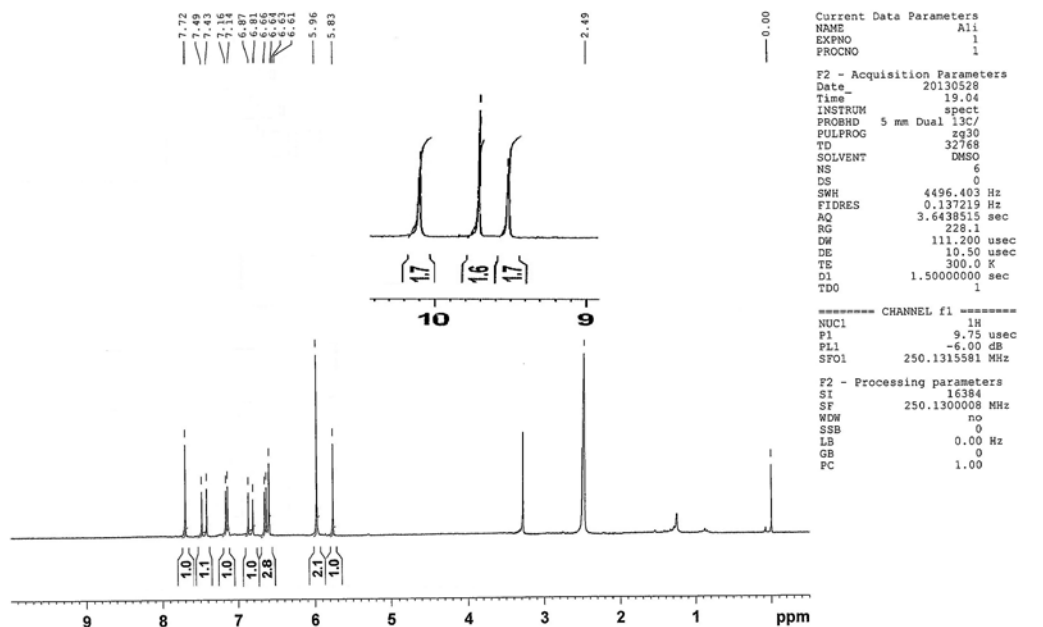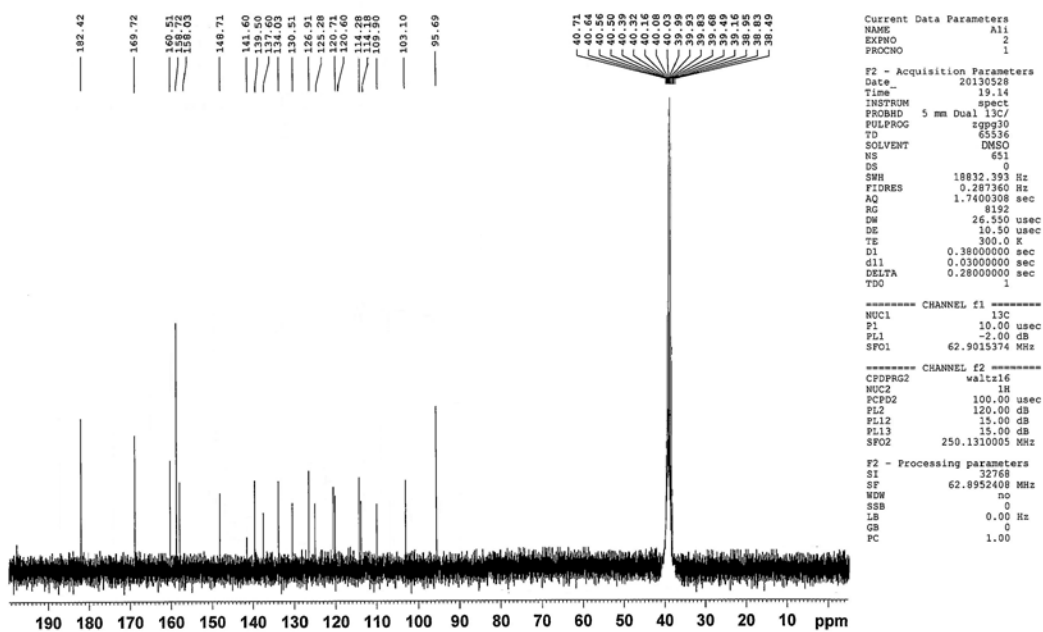

# Compound 12: $^1\text{H}$ and $^{13}\text{C}$ NMR

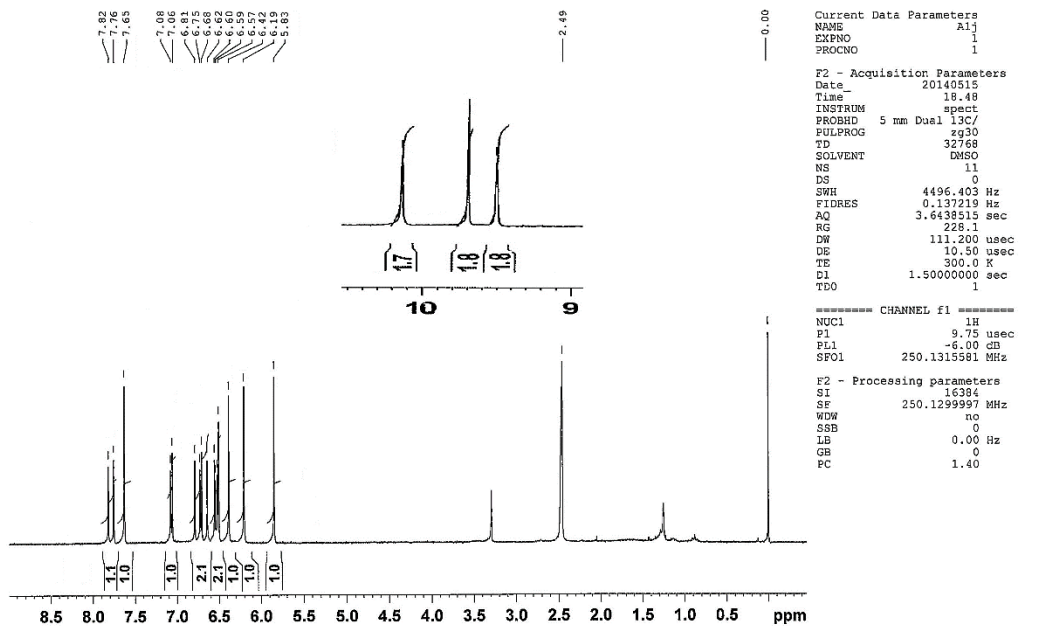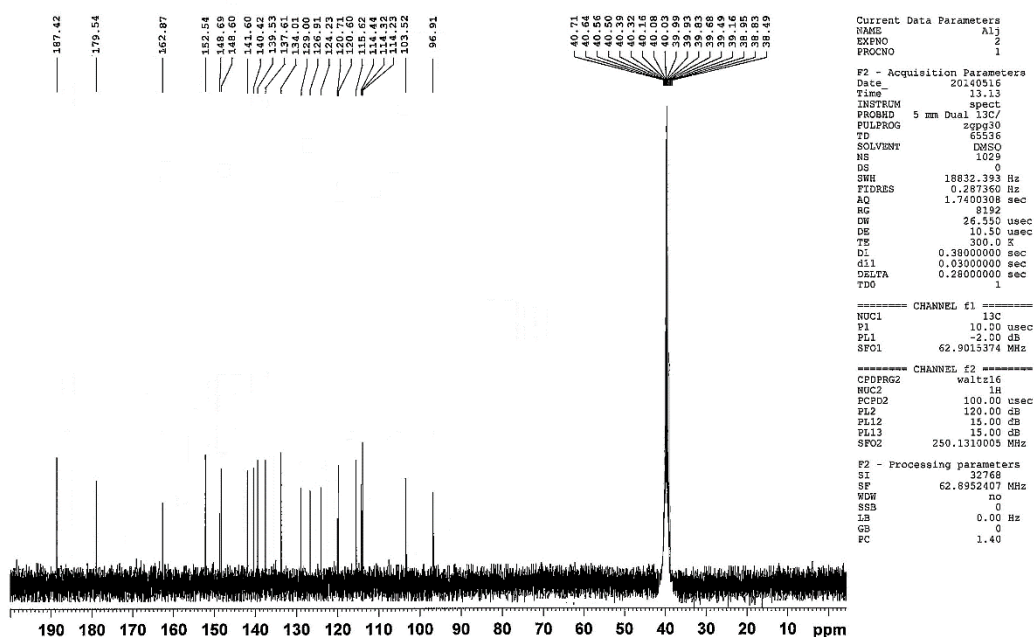

# Compound 13: $^1\text{H}$ and $^{13}\text{C}$ NMR

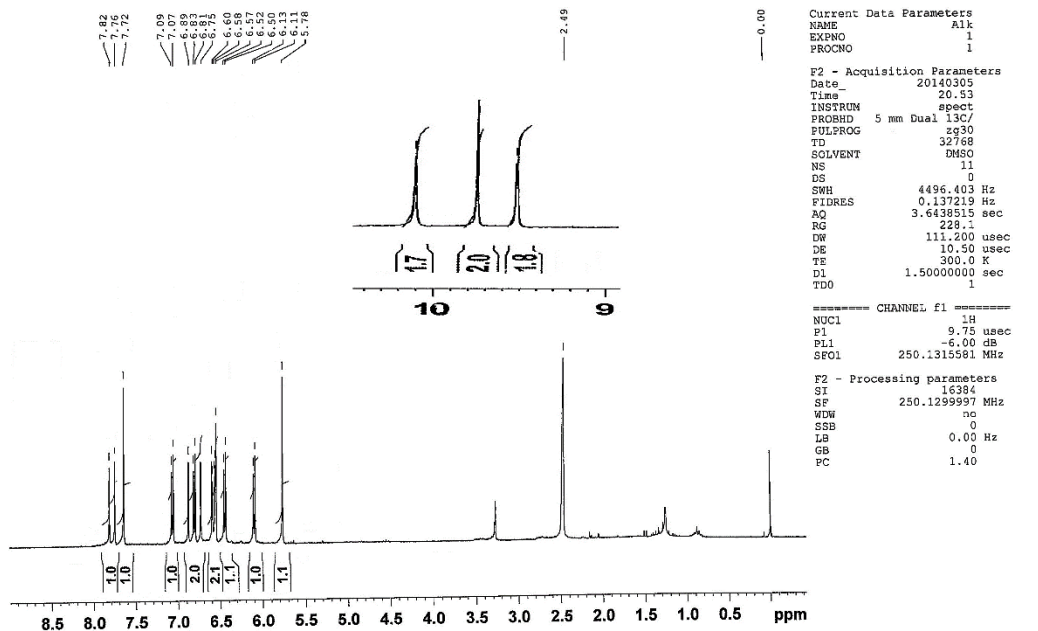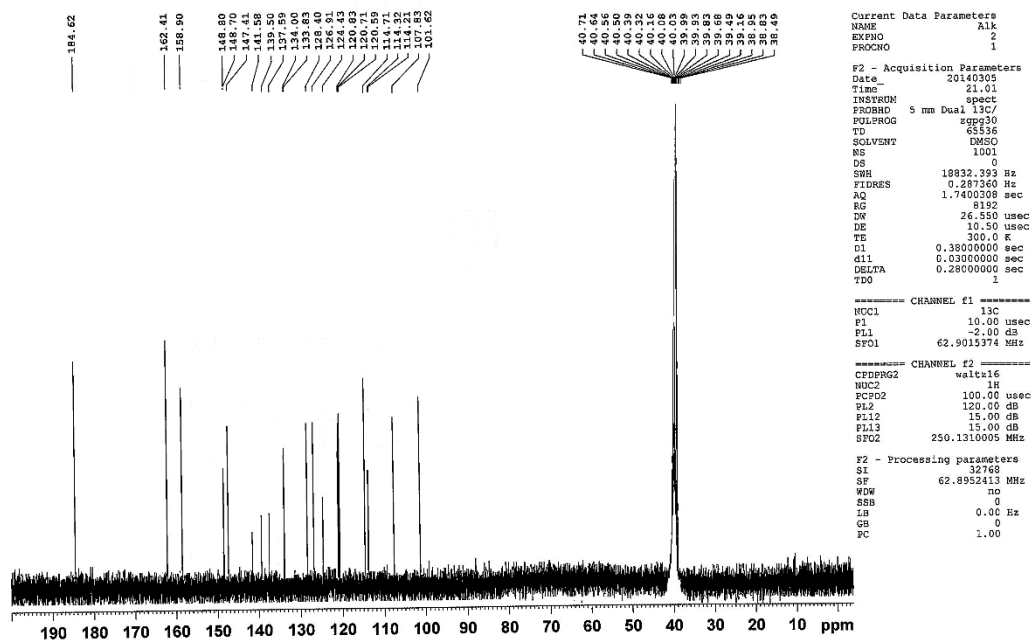

# Compound 14: $^1\text{H}$ and $^{13}\text{C}$ NMR

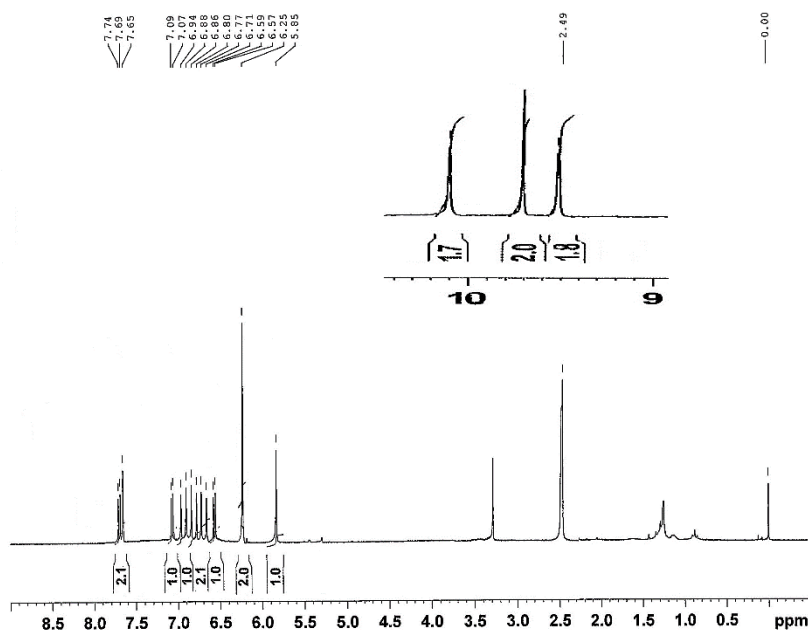

Current Data Parameters  
 NAME All  
 EXPNO 1  
 PROCNO 1

F2 - Acquisition Parameters  
 Date\_ 20140423  
 Time 13.33  
 INSTRUM spect  
 PROBHD 5 mm Dual 13C/  
 PULPROG zg30  
 TD 32768  
 SOLVENT DMSO  
 NS 8  
 DS 0  
 SWH 4496.403 Hz  
 FIDRES 0.137219 Hz  
 AQ 3.6438515 sec  
 RG 228.1  
 DW 111.200 usec  
 DE 10.50 usec  
 TE 300.0 K  
 D1 1.50000000 sec  
 TD0 1

===== CHANNEL f1 =====  
 NUC1  $^1\text{H}$   
 P1 9.75 usec  
 PL1 -6.00 dB  
 SFO1 250.1315581 MHz

F2 - Processing parameters  
 SI 16384  
 SF 250.1299986 MHz  
 WDW no  
 SSB 0  
 LB 0.00 Hz  
 GB 0  
 PC 1.00

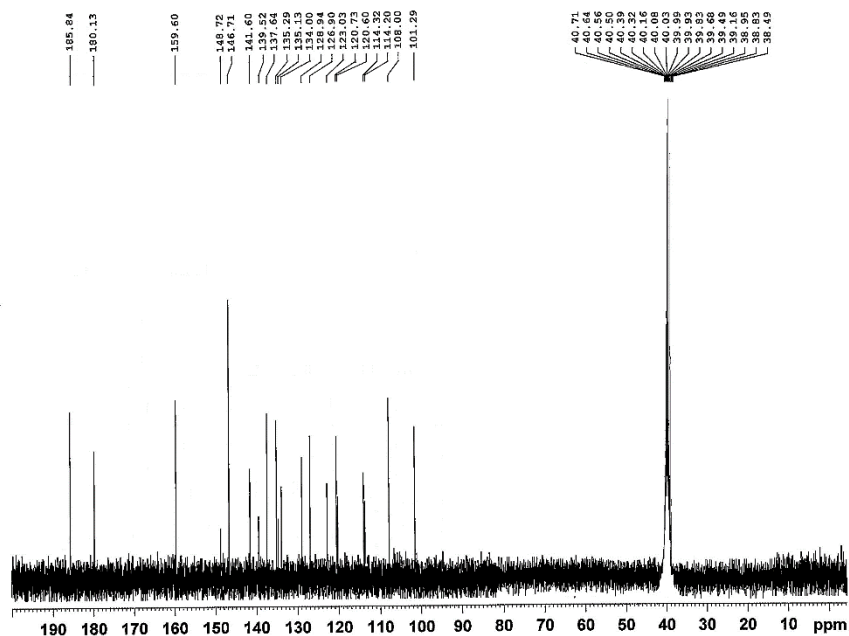

Current Data Parameters  
 NAME All  
 EXPNO 2  
 PROCNO 1

F2 - Acquisition Parameters  
 Date\_ 20140423  
 Time 13.40  
 INSTRUM spect  
 PROBHD 5 mm Dual 13C/  
 PULPROG zgpg30  
 TD 65536  
 SOLVENT DMSO  
 NS 421  
 DS 0  
 SWH 18832.393 Hz  
 FIDRES 0.287360 Hz  
 AQ 1.7400308 sec  
 RG 8192  
 DW 26.550 usec  
 DE 10.50 usec  
 TE 300.0 K  
 D1 0.38000000 sec  
 d11 0.03000000 sec  
 DELTA 0.28000000 sec  
 TD0 1

===== CHANNEL f1 =====  
 NUC1  $^{13}\text{C}$   
 P1 10.00 usec  
 PL1 2.00 dB  
 SFO1 62.9015374 MHz

===== CHANNEL f2 =====  
 CPDPRG2 waltz16  
 NUC2  $^1\text{H}$   
 ZPD2 100.00 usec  
 PL2 120.00 dB  
 PL12 15.00 dB  
 PL13 15.00 dB  
 SFG2 250.1310005 MHz

F2 - Processing parameters  
 SI 32768  
 SF 62.8952419 MHz  
 WDW no  
 SSB 0  
 LB 0.00 Hz  
 GB 0  
 PC 1.00

# Compound 15: $^1\text{H}$ and $^{13}\text{C}$ NMR

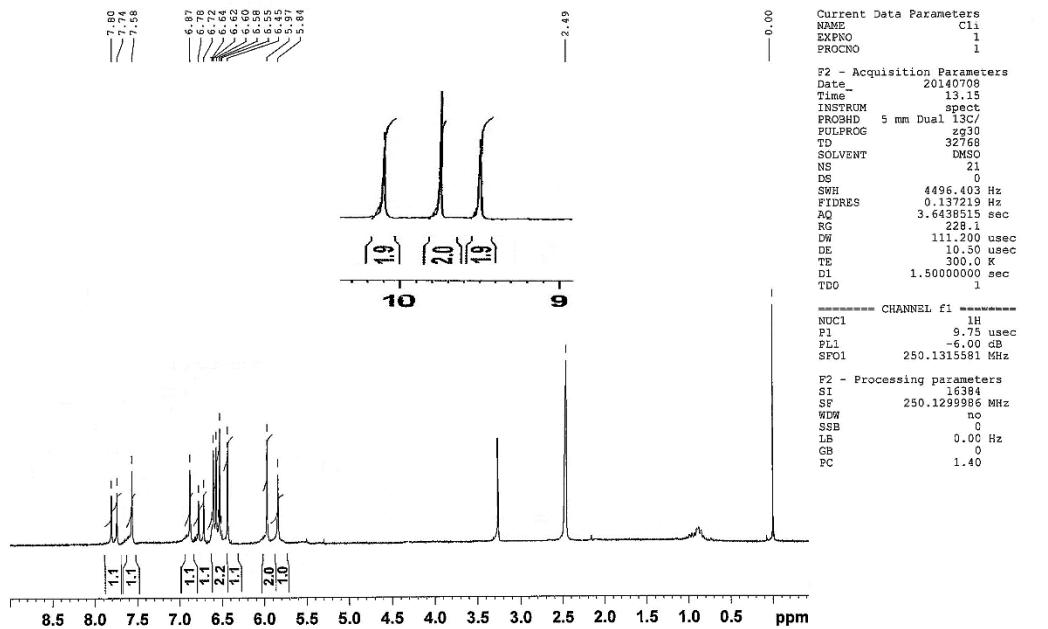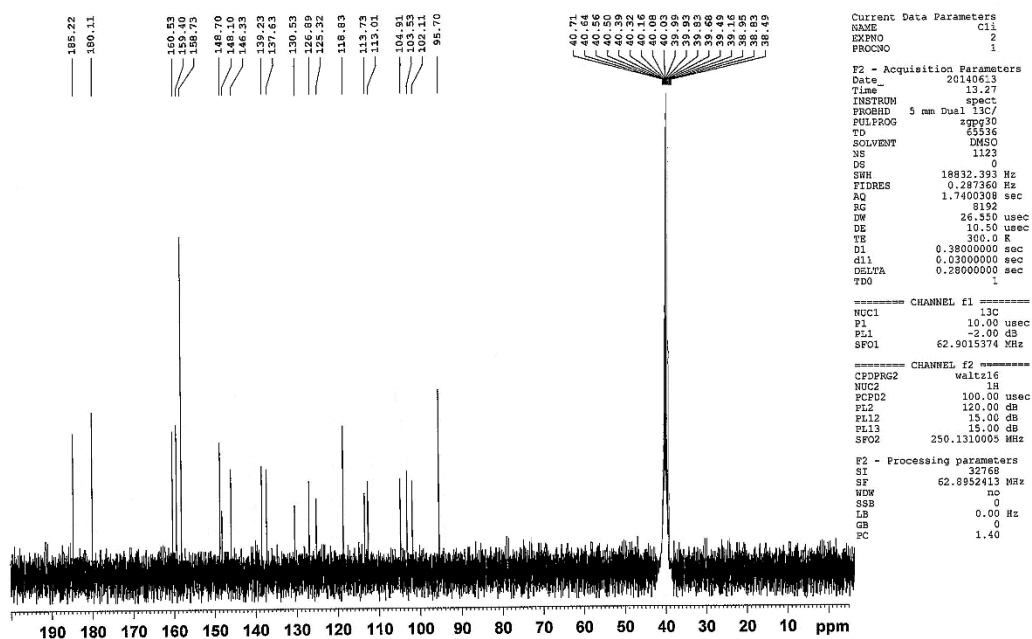



### Compound 16: $^1\text{H}$ and $^{13}\text{C}$ NMR

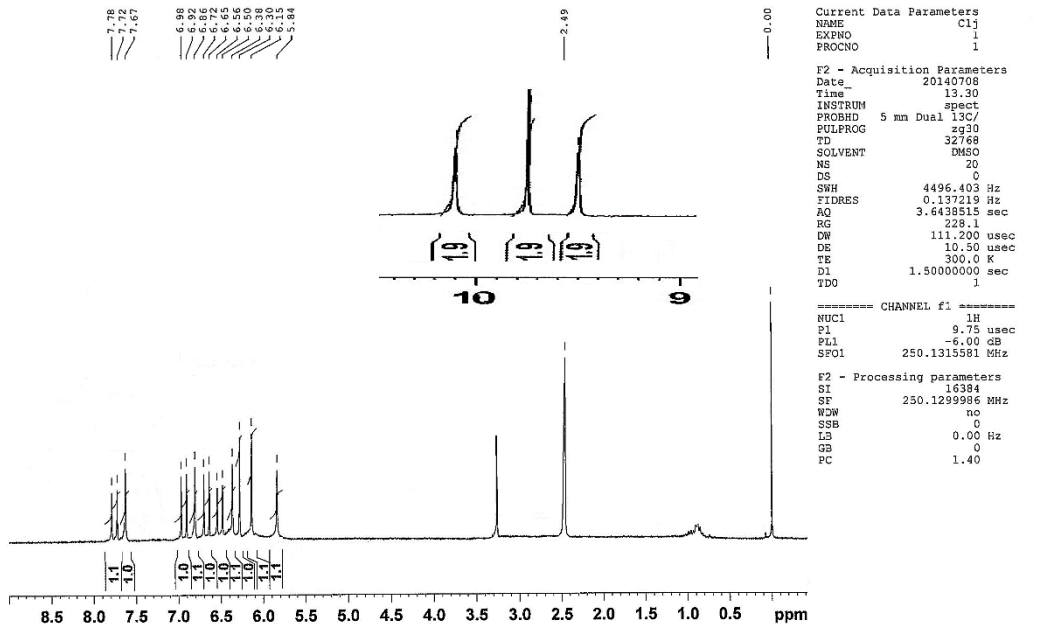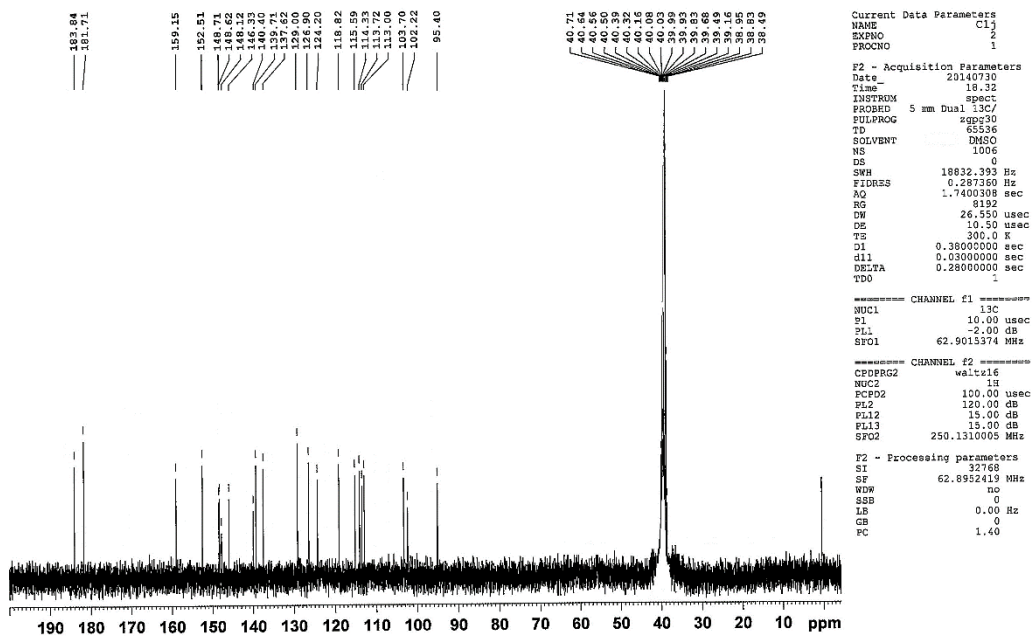

# Compound 17: $^1\text{H}$ and $^{13}\text{C}$ NMR

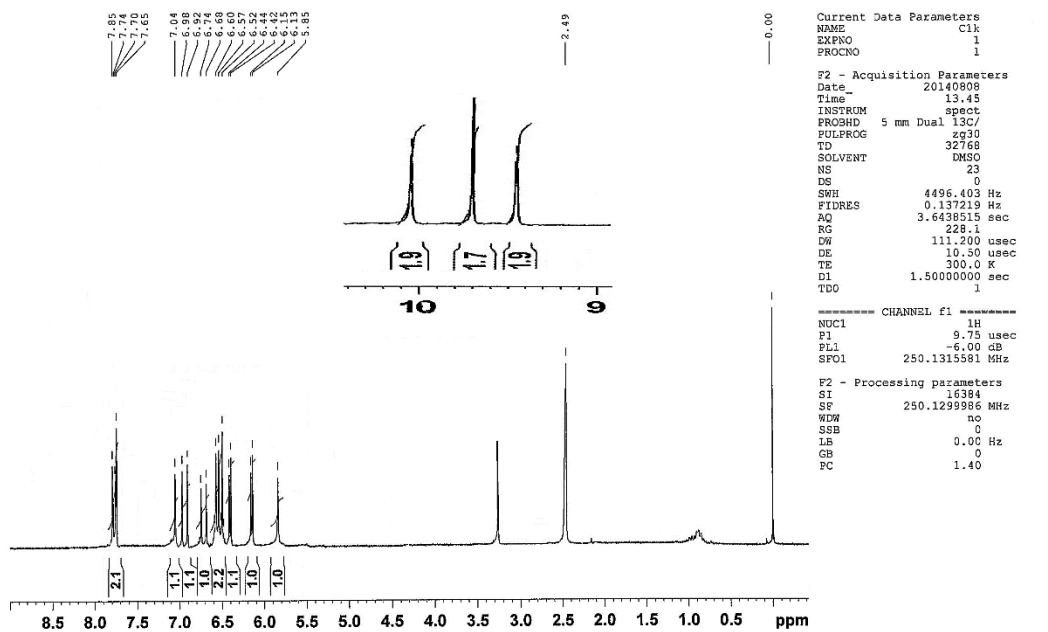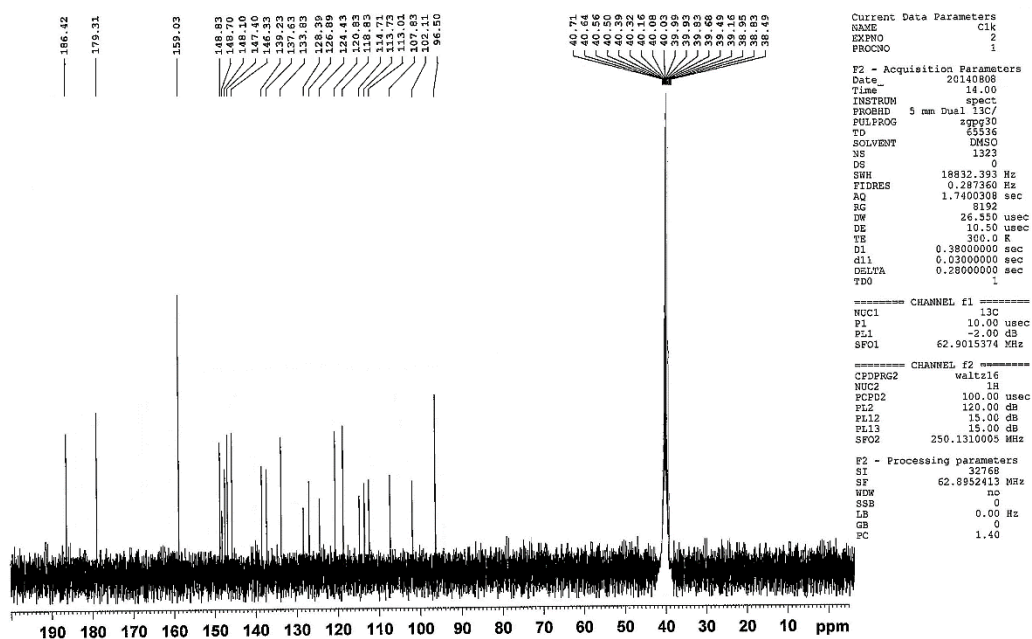

# Compound 18: $^1\text{H}$ and $^{13}\text{C}$ NMR

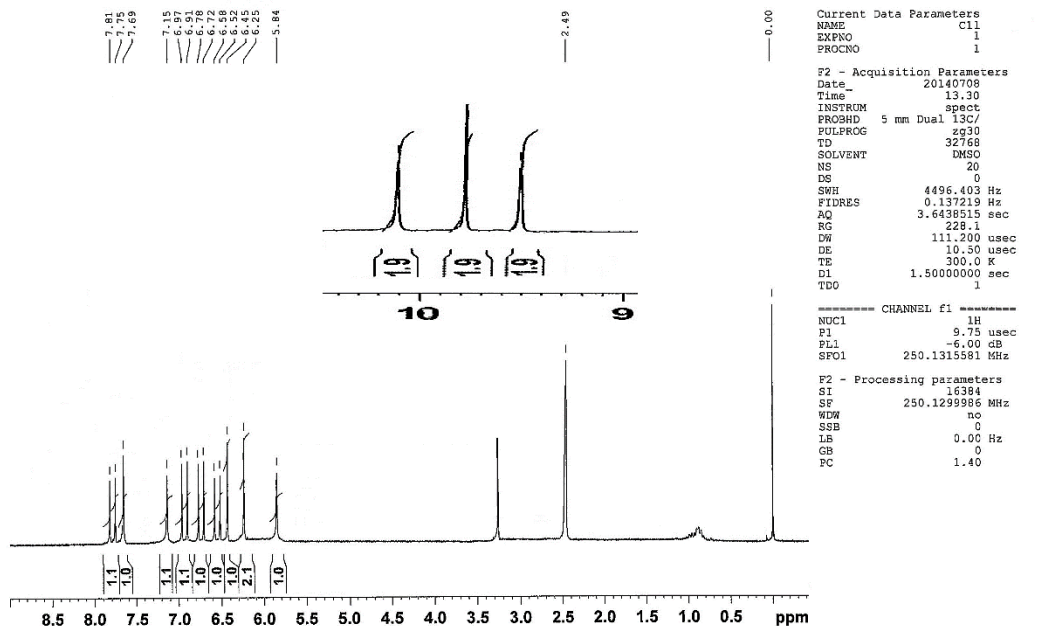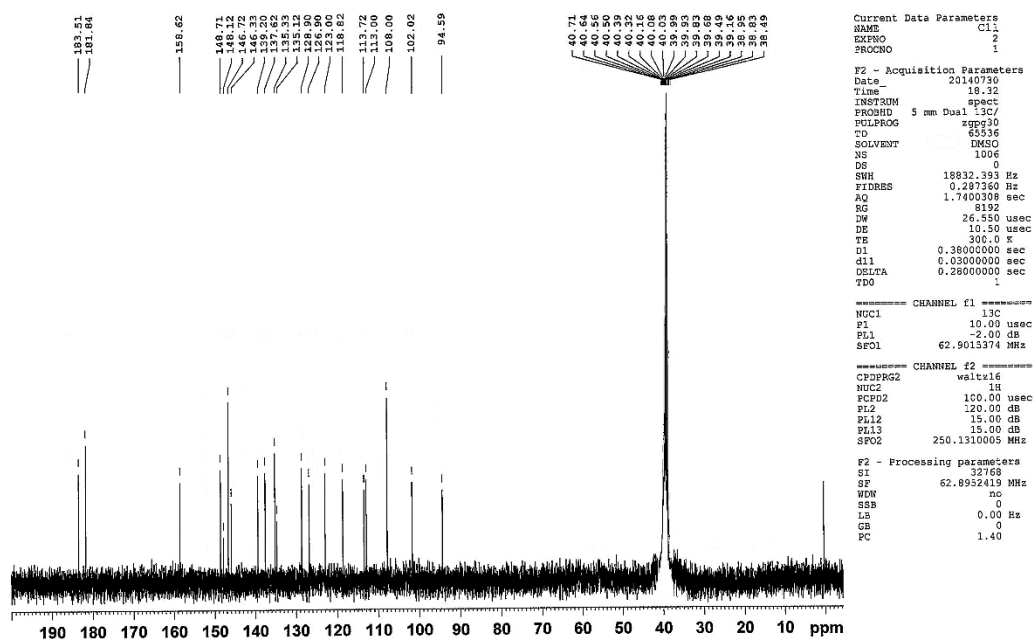

Supplement: s1 [file s1]
